# Supplementary material
Source: PubMed Central journal article supplement (PMC5655070)
Supplement: AAC.01154-17_zac011176605s1.pdf [file AAC.01154-17_zac011176605s1.pdf]

**TABLE S1** Treatment-emergent adverse events (TEAEs)

| MedDRA <sup>a</sup> preferred term, no. (%)              | MHAA4549A           |                    |                     |                     |                        | All<br>(N = 100) |
|----------------------------------------------------------|---------------------|--------------------|---------------------|---------------------|------------------------|------------------|
|                                                          | Placebo<br>(n = 32) | 400 mg<br>(n = 20) | 1200 mg<br>(n = 20) | 3600 mg<br>(n = 20) | Oseltamivir<br>(n = 8) |                  |
| Total number of subjects with at least one adverse event | 28 (87.5%)          | 18 (90%)           | 16 (80%)            | 17 (85%)            | 7 (87.5%)              | 86 (86%)         |
| Total number of adverse events                           | 68                  | 33                 | 39                  | 52                  | 15                     | 207              |
| Procedural hemorrhage                                    | 8 (25%)             | 6 (30%)            | 3 (15%)             | 6 (30%)             | 3 (37.5%)              | 26 (26%)         |
| Alanine aminotransferase increased                       | 5 (15.6%)           | 5 (25%)            | 4 (20%)             | 4 (20%)             | 2 (25%)                | 20 (20%)         |
| Aspartate aminotransferase increased                     | 3 (9.4%)            | 5 (25%)            | 3 (15%)             | 3 (15%)             | 2 (25%)                | 16 (16%)         |
| Amylase increased                                        | 2 (6.3%)            | 1 (5%)             | 1 (5%)              | 0                   | 0                      | 4 (4%)           |
| Upper respiratory tract infection                        | 6 (18.8%)           | 3 (15%)            | 2 (10%)             | 3 (15%)             | 0                      | 14 (14%)         |
| Headache                                                 | 5 (15.6%)           | 0                  | 3 (15%)             | 2 (10%)             | 1 (12.5%)              | 11 (11%)         |
| Nasal congestion                                         | 2 (6.3%)            | 1 (5%)             | 1 (5%)              | 3 (15%)             | 0                      | 7 (7%)           |
| Oropharyngeal pain                                       | 2 (6.3%)            | 0                  | 2 (10%)             | 0                   | 3 (37.5%)              | 7 (7%)           |
| Nausea                                                   | 2 (6.3%)            | 1 (5%)             | 0                   | 3 (15%)             | 0                      | 6 (6%)           |
| Diarrhea                                                 | 2 (6.3%)            | 1 (5%)             | 0                   | 2 (10%)             | 0                      | 5 (5%)           |
| Nasopharyngitis                                          | 0                   | 3 (15%)            | 1 (5%)              | 1 (5%)              | 0                      | 5 (5%)           |
| Rash erythematous                                        | 2 (6.3%)            | 0                  | 0                   | 0                   | 0                      | 2 (2%)           |

<sup>a</sup>MedDRA (Medical Dictionary for Regulatory Activities, v16.1) was used. Multiple occurrences of the same event in a subject were counted once in the overall incidence.

**TABLE S2** Efficacy results for the ITTI population

| Endpoint                                                             | MHAA4549A           |                    |                     |                     |                        |
|----------------------------------------------------------------------|---------------------|--------------------|---------------------|---------------------|------------------------|
|                                                                      | Placebo<br>(n = 21) | 400 mg<br>(n = 11) | 1200 mg<br>(n = 13) | 3600 mg<br>(n = 14) | Oseltamivir<br>(n = 2) |
| Median qPCR AUC ( $\log_{10}$ vps/mL $\times$ h)                     | 458.1               | 247.2              | 444.4               | 11.3                | 57.4                   |
| % Reduction                                                          |                     | 46.0%              | 3.0%                | 97.5%               | 87.5%                  |
| (p-value)                                                            |                     | (0.0455)           | (0.9020)            | (0.0051)            | (0.0558)               |
| Median cell culture AUC ( $\log_{10}$ TCID <sub>50</sub> $\times$ h) | 186.8               | 70.3               | 224.5               | 0.0                 | 28.8                   |
| % Reduction                                                          |                     | 62.4%              | -20.2%              | 100%                | 84.6%                  |
| (p-value)                                                            |                     | (0.0087)           | (0.8742)            | (0.0023)            | (0.0558)               |
| Median qPCR peak ( $\log_{10}$ vps/mL)                               | 6.38                | 5.08               | 6.36                | 1.45                | 2.30                   |
| % Reduction                                                          |                     | 20.4%              | 0.3%                | 77.3%               | 63.9%                  |
| (p-value)                                                            |                     | (0.0187)           | (1.0000)            | (0.0024)            | (0.0947)               |
| Median cell culture peak ( $\log_{10}$ TCID <sub>50</sub> )          | 4.25                | 1.75               | 4.00                | 0.00                | 1.25                   |
| % Reduction                                                          |                     | 58.8%              | 5.9%                | 100%                | 70.6%                  |
| (p-value)                                                            |                     | (0.0220)           | (0.9578)            | (0.0023)            | (0.1150)               |
| Median composite symptom score AUC                                   | 207.7               | 87.5               | 192.1               | 37.7                | 8.1                    |
| % Reduction                                                          |                     | 57.9%              | 7.5%                | 81.8%               | 96.1%                  |
| (p-value)                                                            |                     | (0.2000)           | (0.8743)            | (0.2887)            | (0.0855)               |
| Median total mucus weight (g)                                        | 17.28               | 3.24               | 10.63               | 0.66                | 0.00                   |
| % Reduction                                                          |                     | 81.3%              | 38.5%               | 96.2%               | 100.0%                 |
| (p-value)                                                            |                     | (0.0384)           | (0.2722)            | (0.0443)            | (0.0496)               |

Comparison of 400-mg, 1200-mg, and 3600-mg MHAA4549A and oseltamivir groups to placebo was performed using the nonparametric Wilcoxon rank-sum test. Percent reduction was calculated as  $100\% \times ([\text{the median of placebo} - \text{the median of active}] / \text{the median of placebo})$ . P-values were not adjusted for multiple testing.

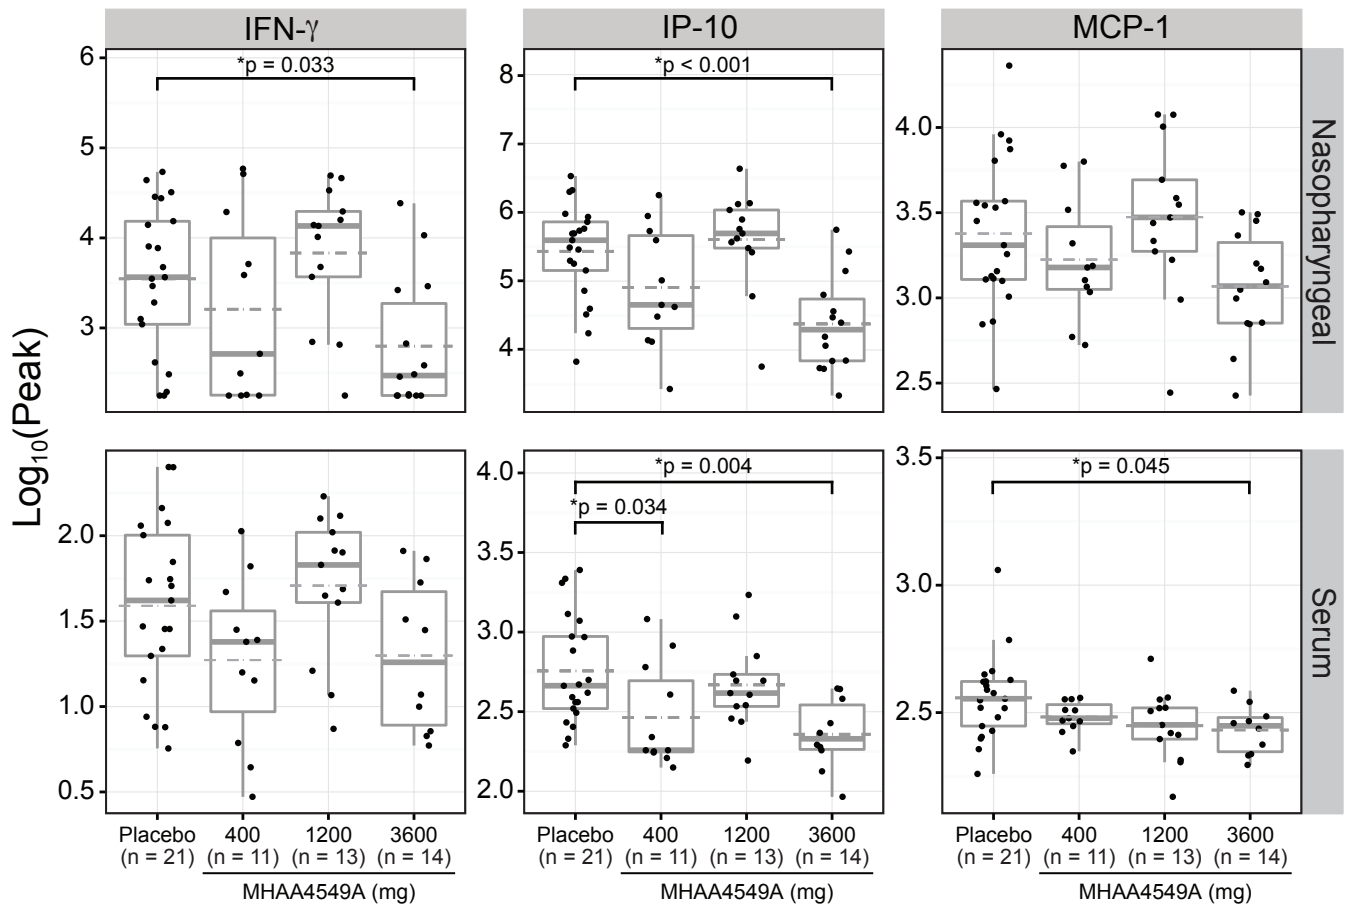

**FIG S1** Effects of MHAA4549A on the peak levels of NP and serum cytokines. IFN- $\gamma$ , IP-10, and MCP-1 cytokine levels were measured in the NP-derived samples (upper panels) and serum (lower panels) of all ITTI subjects. Filled circles represent the peak levels of each subject. Box plots demonstrate the variance, the median (bold line), the mean (dashed line), and interquartile range of each group. Treatment comparisons against the placebo group were performed using the Dunnett's t-test and p-values are shown only for groups that were statistically significant ( $*p < 0.05$ ). IP-10, interferon-inducible protein-10; ITTI, intent-to-treat-infected; MCP-1, monocyte chemoattractant protein-1; NP, nasopharyngeal.
